# Supplementary material for: Antimicrobial Resistance in Papua New Guinea: A Narrative Scoping Review
Source: MDPI journal article supplement (doi:10.3390/antibiotics12121679), 2023-11-29
Supplement: s1 [file s1]

**Table S1.** Antimicrobial resistance among Gram-positive organisms in Papua New Guinea.

| % Resistance to Antibiotic (No. of Isolates Evaluated) |                      |                                           |             |       |            |           |            |           |          |          |          |          |          |          |          |     |        |
|--------------------------------------------------------|----------------------|-------------------------------------------|-------------|-------|------------|-----------|------------|-----------|----------|----------|----------|----------|----------|----------|----------|-----|--------|
| Year                                                   | Location             | Tissue                                    | PCN         | CLX   | MET        | OXA       | AMP        | CTX       | GEN      | CMP      | TET      | ERY      | COT      | TMP      | CLN      | CIP | RIF    |
| <i>Staphylococcus aureus</i>                           |                      |                                           |             |       |            |           |            |           |          |          |          |          |          |          |          |     |        |
| 1971–1981 [14]                                         | Port Moresby         | Pus                                       | 90          |       | 0          |           |            |           | 0        |          |          |          |          |          |          |     |        |
| 1978 [15]                                              | Rabaul               | Pus, sputum                               |             | 0 (1) |            |           |            |           | 0 (1)    |          |          |          |          |          |          |     |        |
| 1979 [14]                                              | Port Moresby         |                                           |             |       |            |           |            |           |          | 100 (1)  |          |          |          |          |          |     |        |
| 1979–1981 [15]                                         | Port Moresby         | Pus                                       | 98          |       | 0          |           |            |           | 0        |          |          |          |          |          |          |     |        |
| 1979–1981 [15]                                         | Port Moresby         |                                           |             |       |            |           |            |           |          | 26       |          |          |          |          |          |     |        |
| 1982–1983 [16]                                         | Goroka               | Skin                                      |             |       |            |           | 100 (1)    |           |          |          |          |          |          |          |          |     |        |
| 1982–1983 [16]                                         | Goroka               | Skin                                      | 98.2 (399)  |       |            |           | 0.75 (399) |           |          |          |          |          |          |          |          |     |        |
| 1982–1986 [17]                                         | Goroka               | Multiple <sup>†</sup>                     | 97 (73)     |       | 3 (73)     |           |            |           | 0 (73)   | 7 (73)   | 3 (66)   | 1 (73)   | 1 (73)   |          |          |     |        |
| 1984 [18]                                              | Goroka               | Skin                                      | 92 (25)     |       |            |           |            |           |          |          |          |          |          |          |          |     |        |
| 1989 [19]                                              | Goroka               | Lung                                      |             |       | 100 (1)    |           |            |           |          |          |          |          |          |          |          |     |        |
| 2000 [20]                                              | Goroka               |                                           |             |       | 11.8 (17)  |           |            |           |          |          |          |          |          |          |          |     |        |
| 2008–2009 [21]                                         | Madang               | Blood                                     |             |       |            | 75 (4)    |            |           |          | 0 (3)    |          |          |          |          |          |     |        |
| 2010 [22]                                              | Madang               | Nasal swabs                               | 100 (44)    |       |            | 9.1 (44)  |            |           |          |          | 4.6 (44) | 2.3 (44) |          | 2.3 (44) | 0 (44)   |     | 0 (44) |
| 2013 [23]                                              | Kundiawa             |                                           |             | 90    |            |           |            |           |          | 90       |          |          |          |          |          | 100 |        |
| 2012–2017 [25]                                         | Kundiawa             | Blood, bone, joint aspirates, soft tissue | 91.5 (47)   |       | 85.1 (47)  | 89.4 (47) | 93.6 (47)  | 80.9 (47) | 8.5 (47) |          | 6.4 (47) | 6.4 (47) | 4.3 (47) |          | 6.4 (47) |     |        |
| 2014 [24]                                              | PNG                  | Blood, urine, wounds                      |             |       | 43.9 (164) |           |            |           |          |          |          |          |          |          |          |     |        |
| <i>Streptococcus pneumoniae</i>                        |                      |                                           |             |       |            |           |            |           |          |          |          |          |          |          |          |     |        |
| 1968–1970 [30]                                         | West Sepik           |                                           | 12 (530)    |       |            |           |            |           |          |          |          |          |          |          |          |     |        |
| 1969 [28]                                              | West Sepik           | Throat swab                               | 100 (1)     |       |            |           |            |           |          |          |          |          |          |          |          |     |        |
| 1971–1974 [28]                                         | PNG                  |                                           | 14 (292)    |       |            |           |            |           |          |          |          |          |          |          |          |     |        |
| 1978 [31]                                              | Port Moresby         |                                           | 33 (57)     |       |            |           |            |           |          | 0        | 0        | 0        |          |          |          |     |        |
| 1978–1981 [31]                                         | Goroka               | Blood, lung                               | 63 (24)     |       |            |           |            |           |          |          |          |          |          |          |          |     |        |
| 1978–1987 [35]                                         | Goroka               | Blood, lung                               | 52 (73)     |       |            |           |            |           |          |          |          |          |          |          |          |     |        |
| 1980–1982 [36]                                         | Goroka               | Nasal swabs                               | 63 (956)    |       |            |           |            |           |          |          |          |          |          |          |          |     |        |
| 1980–1984 [33]                                         | Goroka               | CSF                                       | 22 (67)     |       |            |           |            |           |          | 0        |          |          |          |          |          |     |        |
| 1980–1985 [17]                                         | Goroka, Port Moresby | Multiple <sup>†</sup>                     | 56 * (3018) |       |            |           |            |           |          | 0 (1047) |          |          |          |          |          |     |        |
| 1980–1987 [38]                                         | Goroka               | Nasal swabs, invasive isolates            | 67 (898)    |       |            |           |            |           |          |          |          |          |          |          |          |     |        |
| 1982–1983 [16]                                         | Goroka               | Skin                                      | 60 (5)      |       |            |           |            |           |          | 0        |          |          |          |          |          |     |        |
| 1983–1984 [34]                                         | Goroka               | Blood                                     | 46 (28)     |       |            |           |            |           |          | 0        |          |          |          |          |          |     |        |

|                                        |              |             |               |            |                |          |              |           |  |              |                              |            |             |                               |  |  |  |
|----------------------------------------|--------------|-------------|---------------|------------|----------------|----------|--------------|-----------|--|--------------|------------------------------|------------|-------------|-------------------------------|--|--|--|
| 1985–1987<br>[35]                      | Goroka       | Blood, lung |               |            |                |          |              |           |  | 0<br>(655)   | 0<br>(655)                   | 0<br>(655) | 0<br>(655)  |                               |  |  |  |
| 1989–1992<br>[39]                      | Goroka       | Blood, CSF  | 23<br>(31)    | 22<br>(46) |                |          |              |           |  | 0            |                              | 0          | 74<br>(61)  | 65<br>(32)                    |  |  |  |
| 1996–2005<br>[42]                      | Goroka       | CSF         | 21.5<br>(177) |            | 0.8 *<br>(124) |          |              |           |  | 2.3<br>(176) | 4.2<br>(96)                  |            | 4<br>(176)  |                               |  |  |  |
| 1998–2000<br>[4]                       | Goroka       |             | 100<br>(1)    |            |                |          |              |           |  | 0<br>(1)     |                              |            |             |                               |  |  |  |
| 2000 [41]                              | Goroka       |             |               |            |                |          |              |           |  | 100<br>(2)   |                              |            |             |                               |  |  |  |
| 2006–2009<br>[41]                      | Madang       | Blood, CSF  | 13.3<br>(15)  |            | 0<br>(15)      |          |              |           |  |              | 6.3<br>(16),<br>25 *<br>(16) |            |             | 17.7<br>(17),<br>41 *<br>(17) |  |  |  |
| 2009 [4]                               | Port Moresby |             | 7<br>(40)     |            | 0<br>(13)      | 0<br>(6) | 93.9<br>(33) | 8<br>(38) |  | 4<br>(28)    | 0<br>(40)                    |            | 16.7<br>(6) |                               |  |  |  |
| <b><i>Streptococcus pyogenes</i></b>   |              |             |               |            |                |          |              |           |  |              |                              |            |             |                               |  |  |  |
| 1983 [16]                              | Goroka       | Skin        | 0<br>(337)    |            |                |          |              |           |  |              |                              |            |             |                               |  |  |  |
| 1984–1986<br>[17]                      | Goroka       | Multiple †  | 0             |            |                |          |              |           |  | 0            | 0                            |            |             |                               |  |  |  |
| <b><i>Streptococcus agalactiae</i></b> |              |             |               |            |                |          |              |           |  |              |                              |            |             |                               |  |  |  |
| 1982–1983<br>[16]                      | Goroka       | Skin        | 0<br>(2)      |            |                |          |              |           |  |              |                              |            |             |                               |  |  |  |
| <b>Other β-hemolytic streptococci</b>  |              |             |               |            |                |          |              |           |  |              |                              |            |             |                               |  |  |  |
| 1984–1986<br>[17]                      | Goroka       | Multiple †  | 0<br>(22)     |            |                |          |              |           |  | 5<br>(22)    | 15<br>(20)                   |            |             |                               |  |  |  |
| <b><i>Corynebacterium</i> spp.</b>     |              |             |               |            |                |          |              |           |  |              |                              |            |             |                               |  |  |  |
| 1984–1986<br>[17]                      | Goroka       | Skin        | 0<br>(8)      |            |                |          |              |           |  | 0<br>(8)     | 0<br>(8)                     | 0<br>(8)   |             |                               |  |  |  |

PCN = penicillin, CLX = (flu)cloxacillin, MET = methicillin, OXA = oxacillin, AMP = ampicillin/amoxicillin, CTX = ceftriaxone, GEN = gentamicin, KAN = kanamycin, CMP = chloramphenicol, TET = tetracycline, ERY = erythromycin, COT = cotrimoxazole, TMP = trimethoprim–sulfamethoxazole, CLN = clindamycin, CIP = ciprofloxacin, RIF = rifampicin. \* = intermediate resistance, † = blood, CSF, urine, skin lesions, stool, joint aspirates, lung aspirates.

**Table S2.** Antimicrobial resistance among Gram-negative organisms in Papua New Guinea.

| % Resistance to Antibiotic (No. of Isolates Evaluated) |                                 |                  |               |     |               |           |     |     |     |               |     |     |             |           |     |     |     |
|--------------------------------------------------------|---------------------------------|------------------|---------------|-----|---------------|-----------|-----|-----|-----|---------------|-----|-----|-------------|-----------|-----|-----|-----|
| Year                                                   | Location                        | Tissue           | PCN           | MET | AMP           | CTX       | GEN | KAN | STR | CMP           | TET | ERY | COT         | TMP       | CIP | NAL | SPC |
| <b><i>Haemophilus influenzae</i></b>                   |                                 |                  |               |     |               |           |     |     |     |               |     |     |             |           |     |     |     |
| 1980–1984<br>[33]                                      | Goroka                          | CSF              | 1.8<br>(56)   |     | 0             |           |     |     |     | 0             |     |     |             |           |     |     |     |
| 1981 [32,50]                                           | Goroka                          | CSF, nasopharynx | 0.7<br>(293)  |     |               |           |     |     |     | 0<br>(2)      |     |     |             |           |     |     |     |
| 1981–1986<br>[17]                                      | Goroka                          | Multiple †       | 0.3<br>(1516) |     | 0.3<br>(1516) |           |     |     |     |               |     |     |             |           |     |     |     |
| 1983–1984<br>[34]                                      | Goroka                          | Multiple †       | 0<br>(30)     |     | 0<br>(30)     |           |     |     |     |               |     |     |             |           |     |     |     |
| 1983–1986<br>[17]                                      | Goroka                          | Multiple †       |               |     |               |           |     |     |     | 0<br>(839)    |     |     |             |           |     |     |     |
| 1989–1992<br>[39]                                      | Goroka                          | Blood, CSF       |               |     | 13<br>(24)    |           |     |     |     | 0             | 0   |     | 28<br>(25)  | 44<br>(9) |     |     |     |
| 1996–2005<br>[42]                                      | Goroka                          | CSF              |               |     | 28.4<br>(162) | 5<br>(80) |     |     |     | 31.5<br>(162) |     |     | 34<br>(162) |           |     |     |     |
| 1998 [51]                                              | Lae,<br>Goroka,<br>Port Moresby |                  |               |     |               |           |     |     |     | 25            |     |     |             |           |     |     |     |
| 2000 [37]                                              | Lae,<br>Goroka,<br>Port Moresby |                  |               |     |               |           |     |     |     | 21            |     |     |             |           |     |     |     |
| 2000 [20]                                              | Goroka                          |                  |               |     |               |           |     |     |     | 22.7          |     |     |             |           |     |     |     |
| 2000 [4]                                               | Goroka                          |                  |               |     |               |           |     |     |     | 36.4<br>(11)  |     |     |             |           |     |     |     |

|                                                     |                     |                                        |              |            |                 |            |             |              |             |                 |
|-----------------------------------------------------|---------------------|----------------------------------------|--------------|------------|-----------------|------------|-------------|--------------|-------------|-----------------|
| 2006–2009<br>[41]                                   | Madang              | Blood, CSF                             | 93.3<br>(15) |            | 0<br>(10)       |            | 100<br>(14) | 93.3<br>(15) |             | 100<br>(15)     |
| <b><i>Escherichia coli</i></b>                      |                     |                                        |              |            |                 |            |             |              |             |                 |
| 1978 [15]                                           | Rabaul              | Sputum                                 | 100<br>(1)   | 100<br>(1) |                 | 0<br>(1)   |             | 0<br>(1)     |             |                 |
| 1984–1986<br>[17]                                   | Goroka              | Multiple †                             |              |            | 46<br>(37)      | 3<br>(37)  | 8<br>(13)   | 32<br>(27)   | 11<br>(27)  | 8<br>(37)       |
| 1997–1998<br>[54]                                   | Goroka              |                                        |              |            |                 | 38<br>(8)  |             | 88<br>(8)    |             |                 |
| 2012 [24]                                           | PNG                 | Blood, stool,<br>urine, pus            |              |            | 24.1 †<br>(174) |            |             |              |             | 13.3 §<br>(526) |
| <b><i>Klebsiella spp.</i></b>                       |                     |                                        |              |            |                 |            |             |              |             |                 |
| 1978 [15]                                           | Rabaul              | Sputum                                 | 100<br>(1)   | 100<br>(1) |                 | 0<br>(1)   |             | 0<br>(1)     |             |                 |
| 1992 [56]                                           | Port Mo-<br>resby   | Blood                                  | 100<br>(1)   |            | 100<br>(1)      |            | 100<br>(1)  | 0<br>(1)     |             | 100<br>(1)      |
| 1992 [56]                                           | Port Mo-<br>resby   | Blood                                  |              |            |                 |            |             | 54<br>(28)   | 29<br>(28)  | 61<br>(28)      |
| 1997–1998<br>[54]                                   | Goroka              | Blood, CSF, lung                       |              |            |                 | 76<br>(14) |             | 100<br>(14)  |             |                 |
| 2007–2008<br>[57]                                   | Port Mo-<br>resby   | Blood                                  |              |            | 54 †<br>(57)    |            |             |              |             |                 |
| 2008–2009<br>[21]                                   | Madang              | Blood                                  |              |            | 100<br>(2)      | 50<br>(2)  |             | 100<br>(2)   | 100<br>(2)  | 100<br>(2)      |
| 2012 [24]                                           | PNG                 | Blood, urine,<br>stool, wounds,<br>pus |              |            | 63.5 †<br>(252) |            |             |              |             | 0<br>(2)        |
| <b><i>Klebsiella spp. and Enterobacter spp.</i></b> |                     |                                        |              |            |                 |            |             |              |             |                 |
| 1984–1986<br>[17]                                   | Goroka              | Multiple †                             |              |            | 95<br>(22)      | 5<br>(22)  | 6<br>(17)   | 45<br>(22)   | 36<br>(11)  | 32<br>(22)      |
| <b><i>Enterobacter spp.</i></b>                     |                     |                                        |              |            |                 |            |             |              |             |                 |
| 1997–1998<br>[54]                                   | Goroka              |                                        |              |            |                 | 57<br>(7)  |             | 100<br>(7)   |             |                 |
| <b><i>Proteus mirabilis</i></b>                     |                     |                                        |              |            |                 |            |             |              |             |                 |
| 1997–1998<br>[54]                                   | Goroka              |                                        |              |            |                 | 33<br>(3)  |             | 100<br>(3)   |             |                 |
| <b><i>Proteus spp. and Providencia spp.</i></b>     |                     |                                        |              |            |                 |            |             |              |             |                 |
| 1984–1986<br>[17]                                   | Goroka              | Multiple †                             |              |            | 45<br>(11)      | 18<br>(11) | 33<br>(9)   | 82<br>(11)   | 100<br>(10) | 55<br>(11)      |
| <b><i>Providencia spp.</i></b>                      |                     |                                        |              |            |                 |            |             |              |             |                 |
| 1997–1998<br>[54]                                   | Goroka              |                                        |              |            |                 | 0<br>(1)   |             | 0<br>(1)     |             |                 |
| <b><i>Morganella morganii</i></b>                   |                     |                                        |              |            |                 |            |             |              |             |                 |
| 1997–1998<br>[54]                                   | Goroka              |                                        |              |            |                 | 0<br>(2)   |             | 0<br>(2)     |             |                 |
| <b><i>Pseudomonas spp.</i></b>                      |                     |                                        |              |            |                 |            |             |              |             |                 |
| 1984–1986<br>[17]                                   | Goroka              | Multiple †                             |              |            | 55<br>(11)      | 0<br>(12)  | 30<br>(10)  | 83<br>(12)   | 50<br>(8)   | 67<br>(12)      |
| 1997–1998<br>[54]                                   | Goroka              | Blood, urine,<br>stool, wounds,<br>pus |              |            |                 | 82<br>(11) |             | 100<br>(11)  |             |                 |
| 2008–2009<br>[21]                                   | Madang              | Blood                                  |              |            | 100<br>(1)      | 0<br>(1)   |             | 100<br>(1)   | 100<br>(1)  | 100<br>(1)      |
| <b><i>Acinetobacter spp.</i></b>                    |                     |                                        |              |            |                 |            |             |              |             |                 |
| 1997–1998<br>[54]                                   | Goroka              |                                        |              |            |                 | 0<br>(1)   |             | 100<br>(1)   |             |                 |
| <b><i>Burkholderia cepacia</i></b>                  |                     |                                        |              |            |                 |            |             |              |             |                 |
| 1997–1998<br>[54]                                   | Goroka              |                                        |              |            |                 | 100        |             | 67<br>(3)    |             |                 |
| <b><i>Burkholderia pseudomallei</i></b>             |                     |                                        |              |            |                 |            |             |              |             |                 |
| 1995–2005<br>[67]                                   | Western<br>Province | Clinical, envi-<br>ronmental           |              |            | 0<br>(39)       |            |             | 48.7<br>(39) | 0<br>(39)   |                 |
| <b><i>Aeromonas spp.</i></b>                        |                     |                                        |              |            |                 |            |             |              |             |                 |
| 1984–1986<br>[17]                                   | Goroka              | Stool, skin                            |              |            | 75<br>(8)       | 0<br>(8)   |             | 13<br>(8)    | 0<br>(5)    | 0<br>(8)        |

|                                      |                                                         |                                        |                                   |              |              |                                 |                                 |                               |              |
|--------------------------------------|---------------------------------------------------------|----------------------------------------|-----------------------------------|--------------|--------------|---------------------------------|---------------------------------|-------------------------------|--------------|
| 1997–1998<br>[54]                    | Goroka                                                  |                                        | 0<br>(1)                          |              | 100<br>(1)   |                                 |                                 |                               |              |
| <b><i>Citrobacter freundii</i></b>   |                                                         |                                        |                                   |              |              |                                 |                                 |                               |              |
| 1997–1998<br>[54]                    | Goroka                                                  | Blood, urine,<br>stool, wounds,<br>pus | 100<br>(3)                        |              | 67<br>(3)    |                                 |                                 |                               |              |
| <b><i>Alcaligenes spp.</i></b>       |                                                         |                                        |                                   |              |              |                                 |                                 |                               |              |
| 1997–1998<br>[54]                    | Goroka                                                  |                                        | 0<br>(1)                          |              | 100<br>(1)   |                                 |                                 |                               |              |
| 2008–2009<br>[21]                    | Madang                                                  | Blood                                  | 100<br>(1)                        | 100 *<br>(1) | 0<br>(1)     | 100<br>(1)                      | 0<br>(1)                        | 100 *<br>(1)                  |              |
| <b><i>Shigella spp.</i></b>          |                                                         |                                        |                                   |              |              |                                 |                                 |                               |              |
| 1962–1963<br>[72]                    | Port Mo-<br>resby                                       | Stool                                  |                                   |              | 12.9<br>(70) | 8.6<br>(70)                     |                                 |                               |              |
| 1984–1986<br>[17]                    | Goroka                                                  | Stool                                  | 86<br>(94)                        | 0<br>(94)    | 0<br>(94)    | 83<br>(94)                      | 91<br>(54)                      | 1<br>(94)                     |              |
| 2000–2009<br>[73]                    | Port Mo-<br>resby                                       | Stool                                  | 96<br>(98)                        |              |              | 60<br>(114),<br>27 *<br>(114)   | 86<br>(76)                      |                               | 15<br>(13)   |
| 2010–2011<br>[74]                    | Goroka                                                  | Stool                                  | 91.5<br>(47)                      | 0<br>(47)    |              | 55.3<br>(47)                    | 76.6<br>(47)                    | 70.2<br>(47)                  | 0<br>(47)    |
| 2014 [24]                            | PNG                                                     | Stool                                  |                                   |              |              |                                 |                                 | 0 §<br>(53)                   |              |
| 2018 [75]                            | Oceania<br>(60 samples<br>from PNG)                     | Stool                                  | 70.8<br>(72)                      |              |              | 49<br>(53)                      | 59.7<br>(72)                    | 54.2<br>(72)                  | 6<br>(16)    |
| <b><i>Salmonella spp.</i></b>        |                                                         |                                        |                                   |              |              |                                 |                                 |                               |              |
| 1984–1986<br>[17]                    | Goroka                                                  | Stool                                  | 53<br>(38)                        | 0<br>(38)    | 37<br>(38)   | 58<br>(38)                      | 6<br>(33)                       | 3<br>(38)                     |              |
| 2010–2011<br>[74]                    | Goroka                                                  |                                        | 80<br>(5)                         | 0<br>(5)     |              | 40<br>(5)                       | 60<br>(5)                       | 60<br>(5)                     | 0<br>(5)     |
| 2014 [24]                            | PNG                                                     |                                        |                                   |              |              |                                 |                                 | 33.3 §<br>(15)                |              |
| <b><i>Campylobacter spp.</i></b>     |                                                         |                                        |                                   |              |              |                                 |                                 |                               |              |
| 1984–1986<br>[17]                    |                                                         |                                        | 24<br>(55)                        | 0<br>(55)    |              | 0<br>(55)                       | 0<br>(55)                       | 100<br>(55)                   |              |
| <b><i>Vibrio cholerae</i></b>        |                                                         |                                        |                                   |              |              |                                 |                                 |                               |              |
| 2009 [79]                            | PNG                                                     | Stool                                  |                                   |              |              | 27.8 *<br>(36)                  |                                 |                               |              |
| 2009–2011<br>[79]                    | PNG                                                     | Stool, rectal<br>swabs                 | 75.8<br>(302),<br>17.2 *<br>(302) |              |              | 3.1<br>(255),<br>1.6 *<br>(244) | 3.2<br>(282),<br>1.4 *<br>(282) | 1<br>(305),<br>0.7 *<br>(305) | 0.3<br>(300) |
| 2010 [79]                            | PNG                                                     | Stool                                  |                                   |              |              | 50.5 *<br>(212)                 |                                 |                               |              |
| 2011 [79]                            | PNG                                                     | Stool                                  |                                   |              |              | 11.8 *<br>(51)                  |                                 |                               |              |
| 2011 [79]                            | PNG                                                     | Stool                                  |                                   |              |              | 9.7<br>(299)                    | 38.2<br>(254)                   |                               |              |
| <b><i>Neisseria meningitidis</i></b> |                                                         |                                        |                                   |              |              |                                 |                                 |                               |              |
| 1984–1986<br>[17]                    | Goroka                                                  | Blood, CSF                             | 0<br>(5)                          |              |              | 0<br>(5)                        |                                 |                               |              |
| 2009 [44]                            | Port Mo-<br>resby                                       |                                        | 0                                 | 0            |              | 33<br>(3)                       |                                 |                               |              |
| <b><i>Neisseria gonorrhoeae</i></b>  |                                                         |                                        |                                   |              |              |                                 |                                 |                               |              |
| 1989–1990<br>[83]                    | Port Mo-<br>resby,<br>Goroka, Ra-<br>baul, Lae,<br>Daru |                                        | 44                                |              |              |                                 |                                 |                               |              |
| 1993 [85]                            | PNG                                                     |                                        | 12.5<br>(40)                      |              |              | 7.5<br>(40)                     |                                 | 0 §<br>(40)                   | 3.3<br>(30)  |
| 1994 [84]                            | PNG                                                     |                                        | 8.7<br>(218)                      |              |              | 4.1<br>(218)                    |                                 | 5 §<br>(218)                  | 1.8<br>(57)  |

|                   |                                                     |            |           |           |            |           |           |           |     |
|-------------------|-----------------------------------------------------|------------|-----------|-----------|------------|-----------|-----------|-----------|-----|
| 2004–2005<br>[87] | Port Mo-<br>resby,<br>Goroka,<br>Lae, Mt Ha-<br>gen | 40<br>(52) | 0<br>(52) | 0<br>(52) | 19<br>(52) | 0<br>(52) | 2<br>(52) | 0<br>(52) |     |
| 2005 [86]         | Port Mo-<br>resby                                   | 61.1       |           | 0.7       | 49         |           | 1.2       | 5         | 0.7 |
| 2006 [86]         | Port Mo-<br>resby                                   | 64.7       |           | 0         | 17.7       |           | 1.5       | 2.9       | 0   |

PCN = penicillin, MET = methicillin, AMP = ampicillin/amoxicillin, CTX = ceftriaxone, GEN = gentamicin, KAN = kanamycin, STR = streptomycin, CMP = chloramphenicol, TET = tetracycline, ERY = erythromycin, COT = cotrimoxazole, TMP = trimethoprim–sulfamethoxazole, CIP = ciprofloxacin, NAL = nalidixic acid, SPC = spectinomycin, \* intermediate resistance, <sup>+</sup> blood, CSF, urine, skin lesions, stool, joint aspirates, lung aspirates, <sup>‡</sup> unspecified third-generation cephalosporin resistance, <sup>§</sup> unspecified fluoroquinolone resistance.
